# Supplementary material for: Multiwalled carbon nanotube hybrids as MRI contrast agents
Source: Beilstein J Nanotechnol. 2016 Jul 27;7:1086–103. doi: 10.3762/bjnano.7.102 (PMC4979685; doi:10.3762/bjnano.7.102)
Supplement: File 1 — The data processed from the cited works. [file Beilstein_J_Nanotechnol-07-1086-s001.xlsx]

## Sheet: General information
The data processed from the cited works
“Multiwall carbon nanotube hybrids as MRI contrast agents” by Nikodem Kuźnik, Mateusz M. Tomczyk
Calculation given in mM-1s-1 was converted into (mg/ml)-1s-1 units by following equation:
were:
1000 - the proportionality coeficient
%PM - content of paramagnetic metal in hybrid - Fe or Gd
PM - paramagnetic metal
Mpm - atomic mass of paramagnetic metal
For calculations atomic mass of elements were taken:
MFe= 55,85 g/mol		Iron
MGd=157,25 g/mol		Gadolinum
MO=16 g/mol		Oxygen
MCo=58,93 g/mol		Cobalt

## Sheet: MSC Pol MWCNT#Vittorio
O. Vittorio, S.L. Duce, A. Pietrabissa, A. Cuschieri, Nanotechnology 22 (2011) 095706
%Fe	0.0257	- value reported by authors
r2(mM)-1s-1	564	- value reported by authors
r2(mg/ml)-1s-1	259.531	- value calculated from avialable data

## Sheet: SPIO oMWCNT#Wu
H. Wu, G. Liu, Y. Zhuang, D. Wu, H. Zhang, H. Yang, H. Hu, S. Yang, Biomaterials 32 (2011) 4867.
Percentage of Fe3O4 in hybrid:
Fe3O4	0.413	- value reporeted by authors
Fe	0.298848	- value calculated from Fe3O4 content in the Fe3O4/MWCNT hybrid
Relaxivity
r2(mM)-1s-1	175.5	- value reported by authors
r2(mg/ml)-1s-1	939.082	- value calculated from avialable data

## Sheet: CoFe2O4 oMWCNT#Wu
H. Wu, G. Liu, X. Wang, J. Zhang, Y. Chen, J. Shi, H. Yang, H. Hu, S. Yang, Acta Biomater. 7 (2011) 3496.
	Percentage of CoFe2O4 in hybrid:
CoFe2O4	0.365	- value reported by authors
Fe	0.173765	- calculated from reported CoFe2O4 value
r2(mM)-1s-1	191.3	- value reported by authors
r2(mg/ml)-1s-1	595.188	- value calculated from avialable data
r1(mM)-1s-1	6.8	- value reported by authors
r1(mg/ml)-1s-1	21.1567	- value calculated from avialable data

## Sheet: oMWCNT#Ding
X. Ding, R. Singh, A. Burke, H. Hatcher, J. Olson, R.A. Kraft, M. Schmid, D. Carroll, J.D. Bourland, S. Akman, others, Nanomedicine 6 (2011) 1341.
Author published plots of connection between reciprocal of relaxation time and concentration of MWCNT but did not attached results of linear regresion. Therefore data were read from figure 1b for determination of relaxation value of each hybrid. Concentration was given in mg/ml of MWCNT thus relaxation value is in (mg/ml)-1s-1 units and it was recalculated into mM-1s-1 by the transformation of eq…
MWCNT600		MWCNT400/200		MWCNT60
MWCNT conectration (mg/ml)	1/T2(s)-1	MWCNT conectration (mg/ml)	1/T2(s)-1	MWCNT conectration (mg/ml)	1/T2(s)-1
0.05	13.1507	0.0506667	7.9452	0.0506667	5.75342
0.06	15.8904	0.0606667	9.31507	0.0606667	7.12329
0.07	18.9041	0.0706667	10.9589	0.0706667	8.21918
0.0806667	21.9178	0.08	12.0548	0.08	9.31507
0.09	24.6575	0.09	13.6986	0.09	11.2329
0.100667	30.137	0.100667	14.7945	0.100667	12.6027
0.2	58.6301	0.200667	29.863	0.2	23.0137
0.3	84.9315	0.300667	44.6575	0.3	33.4247
MWCNT type	%Fe	r2(mg/ml)-1s-1	r2(mM)-1s-1
600	0.0292	290.15	554.962
400	0.0205	147.05	400.622
200	0.0171	147.05	480.277
60	0.0126	110.22	488.555

## Sheet: SPIO oMWCNT#Wang
J.T.-W. Wang, L. Cabana, M. Bourgognon, H. Kafa, A. Protti, K. Venner, A.M. Shah, J.K. Sosabowski, S.J. Mather, A. Roig, others, Adv. Funct. Mater. 24 (2014) 1880.
	Percentage of Fe2O4 in hybrid:
Fe2O3	0.415	- value reported by authors
Fe	0.290266	- calculated from reported Fe2O3 value
r2(mM)-1s-1	425	- value reported by authors
r2(mg/ml)-1s-1	2208.83	- value calculated from avialable data

## Sheet: Gd-DTPA-oMWCNT#Marangon
I. Marangon, C. Ménard-Moyon, J. Kolosnjaj-Tabi, M.L. Béoutis, L. Lartigue, D. Alloyeau, E. Pach, B. Ballesteros, G. Autret, T. Ninjbadgar, D.F. Brougham, A. Bianco, F. Gazeau, Adv. Funct. Mater. 24 (2014) 7173.
Atomic mass of Gd (g/mol)	157.25
Loading of nanotubes with Gd (mmol/g)	485	- value reported by authors
Loading of nanotubes with Gd (mg/g)	76.2662	- value calculated from avialable data
%Amount of Gd in nanotubes:	0.0708619	- value calculated from avialable data
B0 [T]	0.47	4.7
r2(mM)-1s-1	13	5.2	- values reported by authors
r2(mg/ml)-1s-1	5.85822	2.34329	- value calculated from avialable data
r1/r2	1.8	0.7	- values reported by authors
r1(mM)-1s-1	23.4	3.64	- value calculated from avialable data
r1(mg/ml)-1s-1	10.5448	1.6403	- value calculated from avialable data

## Sheet: oMWCNT#Maciejewska
B.M. Maciejewska, A. Warowicka, A. Baranowska-Korczyc, K. Załękeski, T. Zalewski, K.K. Kozioł, S. Jurga, Carbon 94 (2015) 1012.
Amount of catalyst used for synthesis	0.02	0.05	0.1
Percentage of iron before oxidation	0.039	0.058	0.124	- values reported by authors
Loss of iron during oxidation	0.4	0.4	0.4	- value reported by authors
Amount of iron after oxidation	0.0156	0.0232	0.0496	- calculated from avialable data
Medium	water			fetal bovine serum			water			fetal bovine serum
Lenght [mm]	1	1	1	1	1	1	0.5	0.5	0.5	0.5	0.5	0.5
%Fe	0.0156	0.0232	0.0496	0.0156	0.0232	0.0496	0.0156	0.0232	0.0496	0.0156	0.0232	0.0496
r2(mM)-1s-1	130.3	164.9	120.8	136.2	86.2	110.4	171	61	43.7	22.4	24	41.4
r2(mg/ml)-1s-1	36.3953	68.4992	107.282	38.0433	35.8073	98.0455	47.7637	25.3393	38.8097	6.25676	9.96956	36.7671

## Sheet: oMWCNT#Kuźnik
N. Kuźnik, M.M. Tomczyk, S. Boncel, A.P. Herman, K.K.K. Koziol, M. Kempka, Mater. Lett. 136 (2014) 34.
	oMWCNT#Kuźnik
B0 [T]	0.4	7
Fe or Fe+Fe3+	0.022
r2(mM)-1s-1	102	63.8
r2(mg/ml)-1s-1	40.1791	25.1316
r1(mM)-1s-1	n/d	0.2
r1(mg/ml)-1s-1	n/d	0.0787825

## Sheet: Fe-oMWCNT#Kuźnik
N. Kuźnik, M.M. Tomczyk, S. Boncel, A.P. Herman, K.K.K. Koziol, M. Kempka, Mater. Lett. 136 (2014) 34.
	Fe-oMWCNT#Kuźnik
B0 [T]	0.4	7
Fe or Fe+Fe3+	0.127	0.127
r2(mM)-1s-1	17.6	15.4
r2(mg/ml)-1s-1	40.0215	35.0188
r1(mM)-1s-1	n/d	0.2
r1(mg/ml)-1s-1	n/d	0.45479

[truncated: 3 more sheets: Fe-PEG-oMWCNT#Kuźnik, Fe-L3-oMWCNT#Kuźnik, Fe-L4-MWCNT#Kuźnik]
